# Supplementary material
Source: publisher figshare collection journal article supplement (https://acs.figshare.com/ndownloader/files/3954823)
Supplement: Supplementary file 1 [file 3954823]

data_oa1103m

_audit_creation_method            SHELXL-97
_chemical_name_systematic
;
HG82D
;
_chemical_name_common             ?
_chemical_melting_point           ?
_chemical_formula_moiety
;
(C21 H16 N3) (B F4)
;
_chemical_formula_sum
 'C21 H16 B F4 N3'
_chemical_formula_weight          397.18

loop_
 _atom_type_symbol
 _atom_type_description
 _atom_type_scat_dispersion_real
 _atom_type_scat_dispersion_imag
 _atom_type_scat_source
 'C'  'C'   0.0033   0.0016
 'International Tables Vol C Tables 4.2.6.8 and 6.1.1.4'
 'H'  'H'   0.0000   0.0000
 'International Tables Vol C Tables 4.2.6.8 and 6.1.1.4'
 'B'  'B'   0.0013   0.0007
 'International Tables Vol C Tables 4.2.6.8 and 6.1.1.4'
 'N'  'N'   0.0061   0.0033
 'International Tables Vol C Tables 4.2.6.8 and 6.1.1.4'
 'F'  'F'   0.0171   0.0103
 'International Tables Vol C Tables 4.2.6.8 and 6.1.1.4'

_symmetry_cell_setting            Triclinic
_symmetry_space_group_name_H-M    P-1

loop_
 _symmetry_equiv_pos_as_xyz
 'x, y, z'
 '-x, -y, -z'

_cell_length_a                    13.1171(8)
_cell_length_b                    13.5030(8)
_cell_length_c                    22.5774(13)
_cell_angle_alpha                 95.970(3)
_cell_angle_beta                  100.719(3)
_cell_angle_gamma                 115.780(3)
_cell_volume                      3459.9(4)
_cell_formula_units_Z             8
_cell_measurement_temperature     120(2)
_cell_measurement_reflns_used     4978
_cell_measurement_theta_min       2.88
_cell_measurement_theta_max       31.54

_exptl_crystal_description        prism
_exptl_crystal_colour             yellow
_exptl_crystal_size_max           0.28
_exptl_crystal_size_mid           0.26
_exptl_crystal_size_min           0.16
_exptl_crystal_density_meas       ?
_exptl_crystal_density_diffrn     1.525
_exptl_crystal_density_method     'not measured'
_exptl_crystal_F_000              1632
_exptl_absorpt_coefficient_mu     0.121
_exptl_absorpt_correction_type    multi-scan
_exptl_absorpt_correction_T_min   0.9669
_exptl_absorpt_correction_T_max   0.9809
_exptl_absorpt_process_details    'TWINABS'

_exptl_special_details
;
 ?
;

_diffrn_ambient_temperature       120(2)
_diffrn_radiation_wavelength      0.71073
_diffrn_radiation_type            MoK\a
_diffrn_radiation_source          'fine-focus sealed tube'
_diffrn_radiation_monochromator   graphite
_diffrn_measurement_device_type   'Bruker APEX-II CCD'
_diffrn_measurement_method        '\f and \w scans'
_diffrn_detector_area_resol_mean  ?
_diffrn_reflns_number             43257
_diffrn_reflns_av_R_equivalents   0.0000
_diffrn_reflns_av_sigmaI/netI     0.0836
_diffrn_reflns_limit_h_min        -19
_diffrn_reflns_limit_h_max        18
_diffrn_reflns_limit_k_min        -19
_diffrn_reflns_limit_k_max        19
_diffrn_reflns_limit_l_min        0
_diffrn_reflns_limit_l_max        33
_diffrn_reflns_theta_min          1.71
_diffrn_reflns_theta_max          31.71
_reflns_number_total              43257
_reflns_number_gt                 26108
_reflns_threshold_expression      >2sigma(I)

_computing_data_collection        'Bruker APEX2'
_computing_cell_refinement        'Bruker SAINT'
_computing_data_reduction         'Bruker SAINT'
_computing_structure_solution     'SHELXS-97 (Sheldrick, 2008)'
_computing_structure_refinement   'SHELXL-97 (Sheldrick, 2008)'
_computing_molecular_graphics     'Bruker SHELXTL'
_computing_publication_material   'Bruker SHELXTL'

_refine_special_details
;
 Refinement of F^2^ against ALL reflections.  The weighted R-factor wR and
 goodness of fit S are based on F^2^, conventional R-factors R are based
 on F, with F set to zero for negative F^2^. The threshold expression of
 F^2^ > 2sigma(F^2^) is used only for calculating R-factors(gt) etc. and is
 not relevant to the choice of reflections for refinement.  R-factors based
 on F^2^ are statistically about twice as large as those based on F, and R-
 factors based on ALL data will be even larger.
;

_refine_ls_structure_factor_coef  Fsqd
_refine_ls_matrix_type            full
_refine_ls_weighting_scheme       calc
_refine_ls_weighting_details
 'calc w=1/[\s^2^(Fo^2^)+(0.0800P)^2^+0.4000P] where P=(Fo^2^+2Fc^2^)/3'
_atom_sites_solution_primary      direct
_atom_sites_solution_secondary    difmap
_atom_sites_solution_hydrogens    geom
_refine_ls_hydrogen_treatment     mixed
_refine_ls_extinction_method      none
_refine_ls_extinction_coef        ?
_refine_ls_number_reflns          43257
_refine_ls_number_parameters      1118
_refine_ls_number_restraints      150
_refine_ls_R_factor_all           0.1198
_refine_ls_R_factor_gt            0.0680
_refine_ls_wR_factor_ref          0.1873
_refine_ls_wR_factor_gt           0.1589
_refine_ls_goodness_of_fit_ref    1.021
_refine_ls_restrained_S_all       1.020
_refine_ls_shift/su_max           0.001
_refine_ls_shift/su_mean          0.000

loop_
 _atom_site_label
 _atom_site_type_symbol
 _atom_site_fract_x
 _atom_site_fract_y
 _atom_site_fract_z
 _atom_site_U_iso_or_equiv
 _atom_site_adp_type
 _atom_site_occupancy
 _atom_site_symmetry_multiplicity
 _atom_site_calc_flag
 _atom_site_refinement_flags
 _atom_site_disorder_assembly
 _atom_site_disorder_group
B1_1 B 0.63494(16) 0.80874(15) 0.56014(8) 0.0285(4) Uani 1 1 d D A 1
F11_1 F 0.65915(9) 0.76604(8) 0.50826(4) 0.0349(2) Uani 1 1 d D A 1
F12_1 F 0.62222(11) 0.90278(9) 0.55115(5) 0.0506(3) Uani 1 1 d D A 1
F13_1 F 0.72710(9) 0.83700(11) 0.61117(4) 0.0546(3) Uani 1 1 d D A 1
F14_1 F 0.53290(9) 0.72979(9) 0.56953(5) 0.0492(3) Uani 1 1 d D A 1
N11_1 N 0.32898(10) 0.67685(10) 0.24147(5) 0.0226(2) Uani 1 1 d . B 1
C12_1 C 0.38153(11) 0.61717(11) 0.23154(6) 0.0191(3) Uani 1 1 d . B 1
N13_1 N 0.45401(10) 0.59923(9) 0.27926(5) 0.0184(2) Uani 1 1 d . B 1
C14_1 C 0.49637(12) 0.67114(11) 0.33628(6) 0.0204(3) Uani 1 1 d . B 1
N14_1 N 0.58743(11) 0.67930(11) 0.37595(6) 0.0247(3) Uani 1 1 d . B 1
H14A_1 H 0.6113(15) 0.7219(15) 0.4116(8) 0.030 Uiso 1 1 d . C 1
H14B_1 H 0.6309(15) 0.6474(14) 0.3657(7) 0.030 Uiso 1 1 d . D 1
C15_1 C 0.43622(12) 0.73491(11) 0.34932(6) 0.0215(3) Uani 1 1 d . B 1
C16_1 C 0.46393(13) 0.80260(11) 0.40766(7) 0.0255(3) Uani 1 1 d . B 1
H16_1 H 0.5242 0.8076 0.4404 0.031 Uiso 1 1 calc R B 1
C17_1 C 0.40275(14) 0.86150(12) 0.41674(7) 0.0291(3) Uani 1 1 d . B 1
H17_1 H 0.4211 0.9071 0.4560 0.035 Uiso 1 1 calc R B 1
C18_1 C 0.31424(14) 0.85491(12) 0.36887(7) 0.0298(3) Uani 1 1 d . B 1
H18_1 H 0.2725 0.8955 0.3760 0.036 Uiso 1 1 calc R B 1
C19_1 C 0.28687(13) 0.79038(12) 0.31156(7) 0.0272(3) Uani 1 1 d . B 1
H19_1 H 0.2264 0.7862 0.2792 0.033 Uiso 1 1 calc R B 1
C20_1 C 0.34896(12) 0.73036(11) 0.30089(6) 0.0223(3) Uani 1 1 d . B 1
C21_1 C 0.47536(11) 0.46705(11) 0.20566(6) 0.0191(3) Uani 1 1 d . B 1
C22_1 C 0.48153(11) 0.50741(11) 0.26696(6) 0.0185(3) Uani 1 1 d . B 1
C23_1 C 0.50108(12) 0.45276(11) 0.31344(6) 0.0222(3) Uani 1 1 d . B 1
H23_1 H 0.4998 0.4776 0.3541 0.027 Uiso 1 1 calc R B 1
C24_1 C 0.52235(13) 0.36211(12) 0.30024(7) 0.0253(3) Uani 1 1 d . B 1
H24_1 H 0.5357 0.3247 0.3319 0.030 Uiso 1 1 calc R B 1
C25_1 C 0.52425(13) 0.32572(12) 0.24083(7) 0.0260(3) Uani 1 1 d . B 1
H25_1 H 0.5425 0.2658 0.2323 0.031 Uiso 1 1 calc R B 1
C26_1 C 0.49970(12) 0.37641(11) 0.19433(6) 0.0221(3) Uani 1 1 d . B 1
H26_1 H 0.4992 0.3495 0.1536 0.027 Uiso 1 1 calc R B 1
C31_1 C 0.43068(11) 0.50917(11) 0.15540(6) 0.0190(3) Uani 1 1 d . B 1
C32_1 C 0.37585(11) 0.57518(11) 0.16791(6) 0.0193(3) Uani 1 1 d . B 1
C33_1 C 0.32155(12) 0.60874(11) 0.12013(6) 0.0228(3) Uani 1 1 d . B 1
H33_1 H 0.2830 0.6517 0.1292 0.027 Uiso 1 1 calc R B 1
C34_1 C 0.32366(12) 0.57982(12) 0.05988(6) 0.0243(3) Uani 1 1 d . B 1
C35_1 C 0.38062(13) 0.51623(12) 0.04794(6) 0.0265(3) Uani 1 1 d . B 1
H35_1 H 0.3838 0.4969 0.0069 0.032 Uiso 1 1 calc R B 1
C36_1 C 0.43239(13) 0.48071(12) 0.09420(6) 0.0244(3) Uani 1 1 d . B 1
H36_1 H 0.4695 0.4367 0.0845 0.029 Uiso 1 1 calc R B 1
C37_1 C 0.26841(15) 0.61804(14) 0.00835(7) 0.0336(3) Uani 1 1 d . B 1
H37A_1 H 0.2145 0.5530 -0.0249 0.050 Uiso 1 1 calc R B 1
H37B_1 H 0.3298 0.6722 -0.0075 0.050 Uiso 1 1 calc R B 1
H37C_1 H 0.2250 0.6538 0.0240 0.050 Uiso 1 1 calc R B 1
B2A_2 B 0.1472(2) 0.31269(18) 0.57862(10) 0.0235(4) Uani 0.865(3) 1 d PD E 1
F21A_2 F 0.18297(10) 0.35457(12) 0.52827(5) 0.0481(4) Uani 0.865(3) 1 d PD E 1
F22A_2 F 0.04009(17) 0.3087(2) 0.57863(14) 0.0285(4) Uani 0.865(3) 1 d PD E 1
F23A_2 F 0.23121(11) 0.38174(11) 0.63259(6) 0.0371(3) Uani 0.865(3) 1 d PD E 1
F24A_2 F 0.13823(11) 0.20621(10) 0.57373(7) 0.0445(4) Uani 0.865(3) 1 d PD E 1
B2B_2 B 0.1569(16) 0.3319(13) 0.5825(7) 0.056(2) Uani 0.135(3) 1 d PD E 2
F21B_2 F 0.1499(8) 0.2472(8) 0.5395(4) 0.056(2) Uani 0.135(3) 1 d PD E 2
F22B_2 F 0.2226(8) 0.4293(8) 0.5649(4) 0.056(2) Uani 0.135(3) 1 d PD E 2
F23B_2 F 0.2120(10) 0.3321(10) 0.6404(5) 0.056(2) Uani 0.135(3) 1 d PD E 2
F24B_2 F 0.0473(16) 0.321(2) 0.5815(12) 0.056(2) Uani 0.135(3) 1 d PD E 2
N11_2 N -0.16545(11) 0.19945(10) 0.26509(5) 0.0261(3) Uani 1 1 d . . .
C12_2 C -0.11332(12) 0.13874(11) 0.25741(6) 0.0222(3) Uani 1 1 d . . .
N13_2 N -0.04287(10) 0.12190(10) 0.30703(5) 0.0230(2) Uani 1 1 d . . .
C14_2 C -0.00427(12) 0.19425(12) 0.36341(6) 0.0252(3) Uani 1 1 d . . .
N14_2 N 0.08553(12) 0.20413(13) 0.40511(6) 0.0316(3) Uani 1 1 d . . .
H14A_2 H 0.1080(17) 0.2452(16) 0.4396(9) 0.038 Uiso 1 1 d . . .
H14B_2 H 0.1227(17) 0.1681(16) 0.3952(8) 0.038 Uiso 1 1 d . . .
C15_2 C -0.06543(13) 0.25831(12) 0.37407(7) 0.0267(3) Uani 1 1 d . . .
C16_2 C -0.04507(14) 0.32391(13) 0.43207(7) 0.0331(4) Uani 1 1 d . . .
H16_2 H 0.0121 0.3284 0.4665 0.040 Uiso 1 1 calc R . .
C17_2 C -0.10827(15) 0.38127(13) 0.43855(8) 0.0360(4) Uani 1 1 d . . .
H17_2 H -0.0955 0.4241 0.4778 0.043 Uiso 1 1 calc R . .
C18_2 C -0.19056(15) 0.37761(13) 0.38851(8) 0.0357(4) Uani 1 1 d . . .
H18_2 H -0.2328 0.4185 0.3937 0.043 Uiso 1 1 calc R . .
C19_2 C -0.21099(14) 0.31529(13) 0.33162(8) 0.0312(3) Uani 1 1 d . . .
H19_2 H -0.2672 0.3131 0.2975 0.037 Uiso 1 1 calc R . .
C20_2 C -0.14884(13) 0.25476(12) 0.32374(7) 0.0259(3) Uani 1 1 d . . .
C21_2 C -0.01732(12) -0.01176(12) 0.23634(7) 0.0242(3) Uani 1 1 d . . .
C22_2 C -0.01457(12) 0.03030(12) 0.29648(7) 0.0238(3) Uani 1 1 d . . .
C23_2 C 0.00244(13) -0.02342(13) 0.34425(7) 0.0298(3) Uani 1 1 d . . .
H23_2 H -0.0018 0.0016 0.3842 0.036 Uiso 1 1 calc R . .
C24_2 C 0.02560(14) -0.11357(14) 0.33291(8) 0.0337(4) Uani 1 1 d . . .
H24_2 H 0.0383 -0.1496 0.3654 0.040 Uiso 1 1 calc R . .
C25_2 C 0.03040(13) -0.15146(13) 0.27466(8) 0.0336(4) Uani 1 1 d . . .
H25_2 H 0.0491 -0.2115 0.2676 0.040 Uiso 1 1 calc R . .
C26_2 C 0.00799(13) -0.10195(12) 0.22680(7) 0.0286(3) Uani 1 1 d . . .
H26_2 H 0.0098 -0.1295 0.1867 0.034 Uiso 1 1 calc R . .
C31_2 C -0.06117(12) 0.02839(11) 0.18434(6) 0.0229(3) Uani 1 1 d . . .
C32_2 C -0.11708(12) 0.09367(11) 0.19476(6) 0.0221(3) Uani 1 1 d . . .
C33_2 C -0.17133(12) 0.12431(12) 0.14524(6) 0.0242(3) Uani 1 1 d . . .
H33_2 H -0.2115 0.1664 0.1528 0.029 Uiso 1 1 calc R . .
C34_2 C -0.16684(13) 0.09383(12) 0.08578(6) 0.0255(3) Uani 1 1 d . . .
C35_2 C -0.10776(13) 0.03112(12) 0.07618(7) 0.0278(3) Uani 1 1 d . . .
H35_2 H -0.1025 0.0111 0.0357 0.033 Uiso 1 1 calc R . .
C36_2 C -0.05694(13) -0.00245(12) 0.12389(7) 0.0264(3) Uani 1 1 d . . .
H36_2 H -0.0191 -0.0465 0.1158 0.032 Uiso 1 1 calc R . .
C37_2 C -0.22114(15) 0.12845(14) 0.03258(7) 0.0333(3) Uani 1 1 d . . .
H37A_2 H -0.2748 0.0618 0.0002 0.050 Uiso 1 1 calc R . .
H37B_2 H -0.1594 0.1807 0.0161 0.050 Uiso 1 1 calc R . .
H37C_2 H -0.2647 0.1655 0.0467 0.050 Uiso 1 1 calc R . .
B3A_3 B 1.0402(2) 0.69703(19) 1.09039(12) 0.0263(5) Uani 0.863(4) 1 d PD F 1
F31A_3 F 0.9981(2) 0.6109(2) 1.03796(14) 0.0374(5) Uani 0.863(4) 1 d PD F 1
F32A_3 F 0.9775(2) 0.7550(2) 1.08643(6) 0.0767(8) Uani 0.863(4) 1 d PD F 1
F33A_3 F 1.15378(15) 0.76899(14) 1.09218(7) 0.0723(7) Uani 0.863(4) 1 d PD F 1
F34A_3 F 1.0376(3) 0.6517(3) 1.14185(14) 0.0570(8) Uani 0.863(4) 1 d PD F 1
B3B_3 B 1.0192(14) 0.6862(14) 1.0863(10) 0.051(2) Uani 0.137(4) 1 d PD F 2
F31B_3 F 1.018(2) 0.6192(19) 1.0355(11) 0.051(2) Uani 0.137(4) 1 d PD F 2
F32B_3 F 0.9081(9) 0.6730(10) 1.0797(4) 0.051(2) Uani 0.137(4) 1 d PD F 2
F33B_3 F 1.0907(9) 0.7972(8) 1.0866(4) 0.051(2) Uani 0.137(4) 1 d PD F 2
F34B_3 F 1.061(2) 0.658(2) 1.1387(10) 0.051(2) Uani 0.137(4) 1 d PD F 2
N11_3 N 0.82218(10) 0.68054(10) 0.77046(5) 0.0237(2) Uani 1 1 d . . .
C12_3 C 0.87225(12) 0.61925(11) 0.75865(6) 0.0205(3) Uani 1 1 d . . .
N13_3 N 0.94301(10) 0.59692(9) 0.80519(5) 0.0198(2) Uani 1 1 d . . .
C14_3 C 0.93392(11) 0.61461(11) 0.86468(6) 0.0205(3) Uani 1 1 d . . .
N14_3 N 0.96946(11) 0.56592(11) 0.90512(6) 0.0252(3) Uani 1 1 d . . .
H14A_3 H 0.9649(15) 0.5794(14) 0.9439(8) 0.030 Uiso 1 1 d . . .
H14B_3 H 0.9837(15) 0.5153(15) 0.8925(8) 0.030 Uiso 1 1 d . . .
C15_3 C 0.88322(12) 0.68615(11) 0.87962(6) 0.0217(3) Uani 1 1 d . . .
C16_3 C 0.88151(13) 0.72091(12) 0.94029(7) 0.0266(3) Uani 1 1 d . . .
H16_3 H 0.9136 0.6962 0.9733 0.032 Uiso 1 1 calc R . .
C17_3 C 0.83311(14) 0.79079(13) 0.95136(7) 0.0305(3) Uani 1 1 d . . .
H17_3 H 0.8326 0.8148 0.9923 0.037 Uiso 1 1 calc R . .
C18_3 C 0.78458(13) 0.82714(13) 0.90328(8) 0.0310(3) Uani 1 1 d . . .
H18_3 H 0.7518 0.8757 0.9118 0.037 Uiso 1 1 calc R . .
C19_3 C 0.78408(13) 0.79286(12) 0.84368(7) 0.0273(3) Uani 1 1 d . . .
H19_3 H 0.7505 0.8174 0.8110 0.033 Uiso 1 1 calc R . .
C20_3 C 0.83321(12) 0.72154(11) 0.83107(6) 0.0225(3) Uani 1 1 d . . .
C21_3 C 0.99213(12) 0.49462(11) 0.72847(6) 0.0214(3) Uani 1 1 d . . .
C22_3 C 1.02043(12) 0.55459(11) 0.78873(6) 0.0207(3) Uani 1 1 d . . .
C23_3 C 1.12598(12) 0.58226(12) 0.83048(7) 0.0240(3) Uani 1 1 d . . .
H23_3 H 1.1474 0.6287 0.8699 0.029 Uiso 1 1 calc R . .
C24_3 C 1.19965(13) 0.54168(13) 0.81427(7) 0.0276(3) Uani 1 1 d . . .
H24_3 H 1.2717 0.5602 0.8427 0.033 Uiso 1 1 calc R . .
C25_3 C 1.16843(14) 0.47390(13) 0.75651(7) 0.0289(3) Uani 1 1 d . . .
H25_3 H 1.2168 0.4426 0.7463 0.035 Uiso 1 1 calc R . .
C26_3 C 1.06703(13) 0.45231(12) 0.71417(7) 0.0254(3) Uani 1 1 d . . .
H26_3 H 1.0475 0.4077 0.6744 0.031 Uiso 1 1 calc R . .
C31_3 C 0.89639(12) 0.49046(11) 0.68127(6) 0.0214(3) Uani 1 1 d . . .
C32_3 C 0.84590(12) 0.55979(11) 0.69516(6) 0.0211(3) Uani 1 1 d . . .
C33_3 C 0.76196(12) 0.56705(12) 0.65000(6) 0.0240(3) Uani 1 1 d . . .
H33_3 H 0.7310 0.6165 0.6600 0.029 Uiso 1 1 calc R . .
C34_3 C 0.72349(13) 0.50269(12) 0.59068(6) 0.0262(3) Uani 1 1 d . . .
C35_3 C 0.77300(13) 0.43250(13) 0.57731(7) 0.0278(3) Uani 1 1 d . . .
H35_3 H 0.7474 0.3876 0.5370 0.033 Uiso 1 1 calc R . .
C36_3 C 0.85785(13) 0.42658(12) 0.62093(6) 0.0259(3) Uani 1 1 d . . .
H36_3 H 0.8905 0.3790 0.6101 0.031 Uiso 1 1 calc R . .
C37_3 C 0.62992(14) 0.50632(14) 0.54277(7) 0.0326(3) Uani 1 1 d . . .
H37A_3 H 0.6548 0.5159 0.5045 0.049 Uiso 1 1 calc R . .
H37B_3 H 0.6167 0.5695 0.5575 0.049 Uiso 1 1 calc R . .
H37C_3 H 0.5571 0.4359 0.5350 0.049 Uiso 1 1 calc R . .
B4_4 B 0.50480(15) 0.17072(14) 1.06768(7) 0.0250(3) Uani 1 1 d D . .
F41_4 F 0.50084(9) 0.11045(8) 1.01262(4) 0.0348(2) Uani 1 1 d D . .
F42_4 F 0.46708(11) 0.24892(9) 1.05507(4) 0.0475(3) Uani 1 1 d D . .
F43_4 F 0.61741(10) 0.22345(10) 1.10467(5) 0.0560(3) Uani 1 1 d D . .
F44_4 F 0.43295(9) 0.09638(9) 1.09801(5) 0.0449(3) Uani 1 1 d D . .
N11_4 N 0.31906(10) 0.15101(10) 0.73895(5) 0.0227(2) Uani 1 1 d . . .
C12_4 C 0.37063(12) 0.08960(11) 0.73041(6) 0.0202(3) Uani 1 1 d . . .
N13_4 N 0.44212(10) 0.07273(9) 0.77938(5) 0.0191(2) Uani 1 1 d . . .
C14_4 C 0.43276(12) 0.09652(11) 0.83842(6) 0.0198(3) Uani 1 1 d . . .
N14_4 N 0.47218(11) 0.05627(11) 0.88256(6) 0.0242(3) Uani 1 1 d . . .
H14A_4 H 0.4670(15) 0.0731(14) 0.9194(8) 0.029 Uiso 1 1 d . . .
H14B_4 H 0.4997(15) 0.0115(15) 0.8758(8) 0.029 Uiso 1 1 d . . .
C15_4 C 0.37823(12) 0.16647(11) 0.84940(6) 0.0206(3) Uani 1 1 d . . .
C16_4 C 0.37406(13) 0.20557(12) 0.90885(7) 0.0249(3) Uani 1 1 d . . .
H16_4 H 0.4072 0.1854 0.9437 0.030 Uiso 1 1 calc R . .
C17_4 C 0.32156(13) 0.27325(12) 0.91587(7) 0.0286(3) Uani 1 1 d . . .
H17_4 H 0.3187 0.2996 0.9559 0.034 Uiso 1 1 calc R . .
C18_4 C 0.27242(13) 0.30394(12) 0.86524(7) 0.0291(3) Uani 1 1 d . . .
H18_4 H 0.2368 0.3510 0.8710 0.035 Uiso 1 1 calc R . .
C19_4 C 0.27560(13) 0.26602(12) 0.80703(7) 0.0267(3) Uani 1 1 d . . .
H19_4 H 0.2427 0.2873 0.7726 0.032 Uiso 1 1 calc R . .
C20_4 C 0.32744(12) 0.19598(11) 0.79847(6) 0.0218(3) Uani 1 1 d . . .
C21_4 C 0.49341(12) -0.03418(11) 0.70622(6) 0.0211(3) Uani 1 1 d . . .
C22_4 C 0.52023(12) 0.02927(11) 0.76530(6) 0.0201(3) Uani 1 1 d . . .
C23_4 C 0.62611(12) 0.06040(12) 0.80790(6) 0.0232(3) Uani 1 1 d . . .
H23_4 H 0.6469 0.1094 0.8464 0.028 Uiso 1 1 calc R . .
C24_4 C 0.70115(13) 0.01937(13) 0.79381(7) 0.0265(3) Uani 1 1 d . . .
H24_4 H 0.7728 0.0394 0.8230 0.032 Uiso 1 1 calc R . .
C25_4 C 0.67170(14) -0.05074(13) 0.73716(7) 0.0272(3) Uani 1 1 d . . .
H25_4 H 0.7212 -0.0816 0.7283 0.033 Uiso 1 1 calc R . .
C26_4 C 0.57037(13) -0.07539(12) 0.69385(6) 0.0241(3) Uani 1 1 d . . .
H26_4 H 0.5522 -0.1214 0.6547 0.029 Uiso 1 1 calc R . .
C31_4 C 0.39824(12) -0.04174(11) 0.65710(6) 0.0208(3) Uani 1 1 d . . .
C32_4 C 0.34623(12) 0.02721(11) 0.66832(6) 0.0204(3) Uani 1 1 d . . .
C33_4 C 0.26495(12) 0.03330(12) 0.62056(6) 0.0232(3) Uani 1 1 d . . .
H33_4 H 0.2322 0.0821 0.6287 0.028 Uiso 1 1 calc R . .
C34_4 C 0.23192(12) -0.03069(12) 0.56181(6) 0.0249(3) Uani 1 1 d . . .
C35_4 C 0.28255(13) -0.10142(12) 0.55163(6) 0.0264(3) Uani 1 1 d . . .
H35_4 H 0.2599 -0.1469 0.5118 0.032 Uiso 1 1 calc R . .
C36_4 C 0.36391(13) -0.10696(12) 0.59751(6) 0.0242(3) Uani 1 1 d . . .
H36_4 H 0.3971 -0.1552 0.5888 0.029 Uiso 1 1 calc R . .
C37_4 C 0.14404(14) -0.02578(13) 0.51067(7) 0.0304(3) Uani 1 1 d . . .
H37A_4 H 0.1756 -0.0131 0.4745 0.046 Uiso 1 1 calc R . .
H37B_4 H 0.1277 0.0359 0.5242 0.046 Uiso 1 1 calc R . .
H37C_4 H 0.0714 -0.0970 0.4999 0.046 Uiso 1 1 calc R . .

loop_
 _atom_site_aniso_label
 _atom_site_aniso_U_11
 _atom_site_aniso_U_22
 _atom_site_aniso_U_33
 _atom_site_aniso_U_23
 _atom_site_aniso_U_13
 _atom_site_aniso_U_12
B1_1 0.0297(9) 0.0308(9) 0.0229(8) 0.0003(6) 0.0066(7) 0.0135(7)
F11_1 0.0456(6) 0.0388(5) 0.0276(4) 0.0033(4) 0.0138(4) 0.0252(5)
F12_1 0.0787(8) 0.0428(6) 0.0451(6) 0.0081(5) 0.0253(6) 0.0378(6)
F13_1 0.0388(6) 0.0888(9) 0.0316(5) -0.0095(5) -0.0013(4) 0.0347(6)
F14_1 0.0434(6) 0.0427(6) 0.0499(6) -0.0002(5) 0.0229(5) 0.0076(5)
N11_1 0.0221(6) 0.0212(6) 0.0279(6) 0.0067(5) 0.0083(5) 0.0119(5)
C12_1 0.0165(6) 0.0168(6) 0.0225(6) 0.0051(5) 0.0043(5) 0.0066(5)
N13_1 0.0180(5) 0.0181(5) 0.0199(5) 0.0035(4) 0.0044(4) 0.0094(4)
C14_1 0.0210(7) 0.0178(6) 0.0216(6) 0.0038(5) 0.0077(5) 0.0076(5)
N14_1 0.0245(6) 0.0275(6) 0.0217(6) -0.0007(5) 0.0026(5) 0.0143(5)
C15_1 0.0223(7) 0.0171(6) 0.0266(7) 0.0046(5) 0.0104(5) 0.0089(5)
C16_1 0.0275(7) 0.0191(6) 0.0267(7) 0.0012(5) 0.0100(6) 0.0076(6)
C17_1 0.0314(8) 0.0183(6) 0.0365(8) 0.0012(6) 0.0173(7) 0.0083(6)
C18_1 0.0337(8) 0.0208(7) 0.0440(9) 0.0093(6) 0.0223(7) 0.0153(6)
C19_1 0.0277(8) 0.0224(7) 0.0388(8) 0.0110(6) 0.0146(6) 0.0149(6)
C20_1 0.0231(7) 0.0174(6) 0.0292(7) 0.0071(5) 0.0118(6) 0.0095(5)
C21_1 0.0161(6) 0.0175(6) 0.0219(6) 0.0029(5) 0.0043(5) 0.0066(5)
C22_1 0.0170(6) 0.0166(6) 0.0229(6) 0.0023(5) 0.0040(5) 0.0093(5)
C23_1 0.0222(7) 0.0220(6) 0.0228(6) 0.0058(5) 0.0054(5) 0.0107(6)
C24_1 0.0259(7) 0.0228(7) 0.0280(7) 0.0090(6) 0.0045(6) 0.0123(6)
C25_1 0.0260(7) 0.0222(7) 0.0317(7) 0.0025(6) 0.0041(6) 0.0149(6)
C26_1 0.0208(7) 0.0219(6) 0.0239(7) 0.0011(5) 0.0043(5) 0.0116(6)
C31_1 0.0163(6) 0.0171(6) 0.0207(6) 0.0030(5) 0.0039(5) 0.0059(5)
C32_1 0.0163(6) 0.0179(6) 0.0223(6) 0.0044(5) 0.0050(5) 0.0065(5)
C33_1 0.0187(7) 0.0191(6) 0.0280(7) 0.0060(5) 0.0037(5) 0.0073(5)
C34_1 0.0207(7) 0.0226(7) 0.0241(7) 0.0079(5) 0.0033(5) 0.0057(6)
C35_1 0.0282(8) 0.0258(7) 0.0218(7) 0.0057(5) 0.0071(6) 0.0091(6)
C36_1 0.0243(7) 0.0248(7) 0.0234(7) 0.0029(5) 0.0068(5) 0.0110(6)
C37_1 0.0359(9) 0.0366(8) 0.0297(8) 0.0155(7) 0.0069(6) 0.0168(7)
B2A_2 0.0189(9) 0.0268(10) 0.0239(9) 0.0020(8) 0.0032(7) 0.0114(8)
F21A_2 0.0337(7) 0.0708(10) 0.0370(7) 0.0186(6) 0.0156(5) 0.0178(7)
F22A_2 0.0231(6) 0.0368(9) 0.0284(7) 0.0051(6) 0.0049(5) 0.0173(6)
F23A_2 0.0267(6) 0.0420(7) 0.0342(7) -0.0120(5) -0.0049(5) 0.0178(6)
F24A_2 0.0383(7) 0.0306(6) 0.0625(9) -0.0019(6) 0.0083(6) 0.0185(5)
B2B_2 0.061(3) 0.060(4) 0.050(3) 0.000(3) 0.022(3) 0.029(3)
F21B_2 0.061(3) 0.060(4) 0.050(3) 0.000(3) 0.022(3) 0.029(3)
F22B_2 0.061(3) 0.060(4) 0.050(3) 0.000(3) 0.022(3) 0.029(3)
F23B_2 0.061(3) 0.060(4) 0.050(3) 0.000(3) 0.022(3) 0.029(3)
F24B_2 0.061(3) 0.060(4) 0.050(3) 0.000(3) 0.022(3) 0.029(3)
N11_2 0.0286(7) 0.0257(6) 0.0280(6) 0.0102(5) 0.0097(5) 0.0142(5)
C12_2 0.0205(7) 0.0218(6) 0.0245(7) 0.0107(5) 0.0067(5) 0.0083(6)
N13_2 0.0224(6) 0.0240(6) 0.0243(6) 0.0097(5) 0.0066(5) 0.0111(5)
C14_2 0.0211(7) 0.0274(7) 0.0244(7) 0.0106(6) 0.0083(5) 0.0068(6)
N14_2 0.0261(7) 0.0394(8) 0.0258(6) 0.0057(6) 0.0047(5) 0.0131(6)
C15_2 0.0251(7) 0.0235(7) 0.0295(7) 0.0090(6) 0.0112(6) 0.0072(6)
C16_2 0.0308(8) 0.0291(8) 0.0305(8) 0.0046(6) 0.0098(6) 0.0057(7)
C17_2 0.0347(9) 0.0253(8) 0.0406(9) 0.0007(7) 0.0167(7) 0.0059(7)
C18_2 0.0382(9) 0.0257(8) 0.0477(10) 0.0097(7) 0.0208(8) 0.0146(7)
C19_2 0.0325(8) 0.0259(7) 0.0389(8) 0.0113(6) 0.0138(7) 0.0142(7)
C20_2 0.0266(7) 0.0231(7) 0.0282(7) 0.0092(6) 0.0115(6) 0.0091(6)
C21_2 0.0166(6) 0.0221(7) 0.0309(7) 0.0085(6) 0.0042(5) 0.0063(6)
C22_2 0.0165(6) 0.0242(7) 0.0301(7) 0.0108(6) 0.0048(5) 0.0083(6)
C23_2 0.0233(7) 0.0328(8) 0.0347(8) 0.0167(6) 0.0072(6) 0.0122(6)
C24_2 0.0247(8) 0.0347(8) 0.0448(9) 0.0212(7) 0.0070(7) 0.0145(7)
C25_2 0.0200(7) 0.0278(8) 0.0523(10) 0.0131(7) 0.0035(7) 0.0118(6)
C26_2 0.0206(7) 0.0262(7) 0.0386(8) 0.0085(6) 0.0056(6) 0.0110(6)
C31_2 0.0178(6) 0.0186(6) 0.0278(7) 0.0060(5) 0.0043(5) 0.0048(5)
C32_2 0.0183(7) 0.0212(6) 0.0242(7) 0.0072(5) 0.0057(5) 0.0065(5)
C33_2 0.0209(7) 0.0213(6) 0.0286(7) 0.0078(5) 0.0050(5) 0.0082(6)
C34_2 0.0223(7) 0.0215(7) 0.0257(7) 0.0070(5) 0.0027(5) 0.0048(6)
C35_2 0.0270(8) 0.0241(7) 0.0253(7) 0.0035(6) 0.0063(6) 0.0064(6)
C36_2 0.0239(7) 0.0236(7) 0.0298(7) 0.0034(6) 0.0062(6) 0.0101(6)
C37_2 0.0350(9) 0.0343(8) 0.0269(8) 0.0098(6) 0.0033(6) 0.0139(7)
B3A_3 0.0378(12) 0.0215(10) 0.0236(10) 0.0068(7) 0.0103(9) 0.0158(9)
F31A_3 0.0461(12) 0.0293(7) 0.0317(8) -0.0021(6) -0.0002(8) 0.0188(8)
F32A_3 0.130(2) 0.1029(16) 0.0429(8) 0.0030(9) 0.0108(9) 0.1012(17)
F33A_3 0.0519(11) 0.0625(10) 0.0544(9) -0.0037(7) 0.0119(7) -0.0116(8)
F34A_3 0.104(2) 0.0472(9) 0.0372(8) 0.0238(6) 0.0337(11) 0.0413(14)
B3B_3 0.065(4) 0.067(4) 0.039(3) 0.007(3) 0.019(3) 0.044(3)
F31B_3 0.065(4) 0.067(4) 0.039(3) 0.007(3) 0.019(3) 0.044(3)
F32B_3 0.065(4) 0.067(4) 0.039(3) 0.007(3) 0.019(3) 0.044(3)
F33B_3 0.065(4) 0.067(4) 0.039(3) 0.007(3) 0.019(3) 0.044(3)
F34B_3 0.065(4) 0.067(4) 0.039(3) 0.007(3) 0.019(3) 0.044(3)
N11_3 0.0207(6) 0.0216(6) 0.0272(6) 0.0034(5) 0.0025(5) 0.0102(5)
C12_3 0.0172(6) 0.0168(6) 0.0248(6) 0.0044(5) 0.0025(5) 0.0067(5)
N13_3 0.0176(5) 0.0196(5) 0.0219(5) 0.0034(4) 0.0035(4) 0.0093(5)
C14_3 0.0162(6) 0.0180(6) 0.0237(6) 0.0030(5) 0.0035(5) 0.0058(5)
N14_3 0.0291(7) 0.0257(6) 0.0252(6) 0.0066(5) 0.0076(5) 0.0162(5)
C15_3 0.0166(6) 0.0191(6) 0.0274(7) 0.0030(5) 0.0062(5) 0.0067(5)
C16_3 0.0254(7) 0.0247(7) 0.0300(7) 0.0056(6) 0.0103(6) 0.0109(6)
C17_3 0.0295(8) 0.0263(7) 0.0357(8) 0.0024(6) 0.0153(6) 0.0111(6)
C18_3 0.0243(8) 0.0247(7) 0.0455(9) 0.0022(6) 0.0127(7) 0.0124(6)
C19_3 0.0208(7) 0.0232(7) 0.0383(8) 0.0056(6) 0.0052(6) 0.0118(6)
C20_3 0.0156(6) 0.0187(6) 0.0291(7) 0.0020(5) 0.0035(5) 0.0060(5)
C21_3 0.0224(7) 0.0170(6) 0.0250(7) 0.0064(5) 0.0081(5) 0.0079(5)
C22_3 0.0209(7) 0.0171(6) 0.0264(7) 0.0060(5) 0.0076(5) 0.0101(5)
C23_3 0.0221(7) 0.0224(7) 0.0274(7) 0.0057(5) 0.0053(5) 0.0107(6)
C24_3 0.0242(7) 0.0290(7) 0.0342(8) 0.0111(6) 0.0077(6) 0.0153(6)
C25_3 0.0305(8) 0.0271(7) 0.0385(8) 0.0108(6) 0.0137(7) 0.0188(7)
C26_3 0.0300(8) 0.0226(7) 0.0281(7) 0.0066(6) 0.0104(6) 0.0146(6)
C31_3 0.0210(7) 0.0178(6) 0.0236(6) 0.0067(5) 0.0064(5) 0.0065(5)
C32_3 0.0198(7) 0.0180(6) 0.0213(6) 0.0037(5) 0.0043(5) 0.0056(5)
C33_3 0.0201(7) 0.0210(6) 0.0284(7) 0.0067(5) 0.0049(5) 0.0074(6)
C34_3 0.0215(7) 0.0256(7) 0.0248(7) 0.0086(6) 0.0038(5) 0.0051(6)
C35_3 0.0271(8) 0.0261(7) 0.0234(7) 0.0039(6) 0.0071(6) 0.0064(6)
C36_3 0.0279(8) 0.0225(7) 0.0262(7) 0.0048(5) 0.0098(6) 0.0096(6)
C37_3 0.0279(8) 0.0382(9) 0.0261(7) 0.0084(6) 0.0022(6) 0.0120(7)
B4_4 0.0308(9) 0.0281(8) 0.0208(7) 0.0056(6) 0.0075(6) 0.0173(7)
F41_4 0.0479(6) 0.0362(5) 0.0267(4) 0.0012(4) 0.0084(4) 0.0269(5)
F42_4 0.0935(9) 0.0447(6) 0.0318(5) 0.0150(4) 0.0253(5) 0.0515(6)
F43_4 0.0418(6) 0.0594(7) 0.0459(6) -0.0062(5) -0.0028(5) 0.0145(6)
F44_4 0.0546(7) 0.0517(6) 0.0538(6) 0.0302(5) 0.0326(5) 0.0355(6)
N11_4 0.0212(6) 0.0221(6) 0.0242(6) 0.0030(5) 0.0032(5) 0.0111(5)
C12_4 0.0181(6) 0.0196(6) 0.0209(6) 0.0052(5) 0.0035(5) 0.0074(5)
N13_4 0.0183(5) 0.0202(5) 0.0195(5) 0.0041(4) 0.0047(4) 0.0096(5)
C14_4 0.0178(6) 0.0189(6) 0.0198(6) 0.0034(5) 0.0046(5) 0.0063(5)
N14_4 0.0279(7) 0.0285(6) 0.0223(6) 0.0059(5) 0.0083(5) 0.0177(5)
C15_4 0.0174(6) 0.0177(6) 0.0243(6) 0.0028(5) 0.0056(5) 0.0065(5)
C16_4 0.0242(7) 0.0244(7) 0.0248(7) 0.0036(5) 0.0070(5) 0.0101(6)
C17_4 0.0286(8) 0.0244(7) 0.0312(8) -0.0001(6) 0.0110(6) 0.0108(6)
C18_4 0.0244(7) 0.0209(7) 0.0413(9) 0.0013(6) 0.0099(6) 0.0106(6)
C19_4 0.0223(7) 0.0222(7) 0.0341(8) 0.0041(6) 0.0038(6) 0.0108(6)
C20_4 0.0180(6) 0.0194(6) 0.0252(7) 0.0027(5) 0.0052(5) 0.0067(5)
C21_4 0.0233(7) 0.0182(6) 0.0222(6) 0.0067(5) 0.0088(5) 0.0083(5)
C22_4 0.0195(6) 0.0206(6) 0.0237(6) 0.0075(5) 0.0088(5) 0.0104(5)
C23_4 0.0223(7) 0.0251(7) 0.0241(7) 0.0071(5) 0.0066(5) 0.0120(6)
C24_4 0.0225(7) 0.0314(7) 0.0289(7) 0.0111(6) 0.0076(6) 0.0142(6)
C25_4 0.0305(8) 0.0299(7) 0.0317(8) 0.0122(6) 0.0138(6) 0.0196(7)
C26_4 0.0288(8) 0.0218(7) 0.0257(7) 0.0067(5) 0.0115(6) 0.0132(6)
C31_4 0.0212(7) 0.0195(6) 0.0209(6) 0.0063(5) 0.0073(5) 0.0077(5)
C32_4 0.0190(6) 0.0189(6) 0.0204(6) 0.0041(5) 0.0054(5) 0.0060(5)
C33_4 0.0203(7) 0.0227(7) 0.0239(7) 0.0064(5) 0.0047(5) 0.0078(6)
C34_4 0.0206(7) 0.0227(7) 0.0235(7) 0.0054(5) 0.0054(5) 0.0030(6)
C35_4 0.0257(7) 0.0240(7) 0.0220(7) 0.0028(5) 0.0079(6) 0.0047(6)
C36_4 0.0259(7) 0.0204(6) 0.0244(7) 0.0038(5) 0.0090(6) 0.0082(6)
C37_4 0.0263(8) 0.0341(8) 0.0230(7) 0.0048(6) 0.0001(6) 0.0099(7)

_geom_special_details
;
 All esds (except the esd in the dihedral angle between two l.s. planes)
 are estimated using the full covariance matrix.  The cell esds are taken
 into account individually in the estimation of esds in distances, angles
 and torsion angles; correlations between esds in cell parameters are only
 used when they are defined by crystal symmetry.  An approximate (isotropic)
 treatment of cell esds is used for estimating esds involving l.s. planes.
;

loop_
 _geom_bond_atom_site_label_1
 _geom_bond_atom_site_label_2
 _geom_bond_distance
 _geom_bond_site_symmetry_2
 _geom_bond_publ_flag
B1_1 F14_1 1.373(2) . ?
B1_1 F12_1 1.381(2) . ?
B1_1 F13_1 1.387(2) . ?
B1_1 F11_1 1.4009(18) . ?
N11_1 C12_1 1.2953(17) . ?
N11_1 C20_1 1.3760(17) . ?
C12_1 N13_1 1.4131(17) . ?
C12_1 C32_1 1.4645(18) . ?
N13_1 C14_1 1.3834(16) . ?
N13_1 C22_1 1.4491(16) . ?
C14_1 N14_1 1.3069(18) . ?
C14_1 C15_1 1.4407(18) . ?
N14_1 H14A_1 0.855(17) . ?
N14_1 H14B_1 0.898(17) . ?
C15_1 C20_1 1.403(2) . ?
C15_1 C16_1 1.4089(18) . ?
C16_1 C17_1 1.379(2) . ?
C16_1 H16_1 0.9500 . ?
C17_1 C18_1 1.395(2) . ?
C17_1 H17_1 0.9500 . ?
C18_1 C19_1 1.372(2) . ?
C18_1 H18_1 0.9500 . ?
C19_1 C20_1 1.4089(19) . ?
C19_1 H19_1 0.9500 . ?
C21_1 C26_1 1.4038(18) . ?
C21_1 C22_1 1.4076(18) . ?
C21_1 C31_1 1.4600(19) . ?
C22_1 C23_1 1.3918(19) . ?
C23_1 C24_1 1.3847(19) . ?
C23_1 H23_1 0.9500 . ?
C24_1 C25_1 1.388(2) . ?
C24_1 H24_1 0.9500 . ?
C25_1 C26_1 1.375(2) . ?
C25_1 H25_1 0.9500 . ?
C26_1 H26_1 0.9500 . ?
C31_1 C36_1 1.4021(18) . ?
C31_1 C32_1 1.4045(18) . ?
C32_1 C33_1 1.4046(19) . ?
C33_1 C34_1 1.3844(19) . ?
C33_1 H33_1 0.9500 . ?
C34_1 C35_1 1.398(2) . ?
C34_1 C37_1 1.510(2) . ?
C35_1 C36_1 1.380(2) . ?
C35_1 H35_1 0.9500 . ?
C36_1 H36_1 0.9500 . ?
C37_1 H37A_1 0.9800 . ?
C37_1 H37B_1 0.9800 . ?
C37_1 H37C_1 0.9800 . ?
B2A_2 F24A_2 1.381(2) . ?
B2A_2 F22A_2 1.383(2) . ?
B2A_2 F21A_2 1.390(3) . ?
B2A_2 F23A_2 1.392(2) . ?
B2B_2 F23B_2 1.370(14) . ?
B2B_2 F22B_2 1.372(14) . ?
B2B_2 F24B_2 1.377(14) . ?
B2B_2 F21B_2 1.380(14) . ?
N11_2 C12_2 1.2930(18) . ?
N11_2 C20_2 1.3799(18) . ?
C12_2 N13_2 1.4182(18) . ?
C12_2 C32_2 1.4636(18) . ?
N13_2 C14_2 1.3792(18) . ?
N13_2 C22_2 1.4475(18) . ?
C14_2 N14_2 1.310(2) . ?
C14_2 C15_2 1.443(2) . ?
N14_2 H14A_2 0.826(19) . ?
N14_2 H14B_2 0.865(19) . ?
C15_2 C20_2 1.404(2) . ?
C15_2 C16_2 1.412(2) . ?
C16_2 C17_2 1.374(2) . ?
C16_2 H16_2 0.9500 . ?
C17_2 C18_2 1.390(3) . ?
C17_2 H17_2 0.9500 . ?
C18_2 C19_2 1.371(2) . ?
C18_2 H18_2 0.9500 . ?
C19_2 C20_2 1.403(2) . ?
C19_2 H19_2 0.9500 . ?
C21_2 C26_2 1.401(2) . ?
C21_2 C22_2 1.404(2) . ?
C21_2 C31_2 1.468(2) . ?
C22_2 C23_2 1.398(2) . ?
C23_2 C24_2 1.388(2) . ?
C23_2 H23_2 0.9500 . ?
C24_2 C25_2 1.384(2) . ?
C24_2 H24_2 0.9500 . ?
C25_2 C26_2 1.380(2) . ?
C25_2 H25_2 0.9500 . ?
C26_2 H26_2 0.9500 . ?
C31_2 C32_2 1.3977(19) . ?
C31_2 C36_2 1.403(2) . ?
C32_2 C33_2 1.4086(19) . ?
C33_2 C34_2 1.382(2) . ?
C33_2 H33_2 0.9500 . ?
C34_2 C35_2 1.400(2) . ?
C34_2 C37_2 1.502(2) . ?
C35_2 C36_2 1.381(2) . ?
C35_2 H35_2 0.9500 . ?
C36_2 H36_2 0.9500 . ?
C37_2 H37A_2 0.9800 . ?
C37_2 H37B_2 0.9800 . ?
C37_2 H37C_2 0.9800 . ?
B3A_3 F32A_3 1.357(3) . ?
B3A_3 F34A_3 1.367(3) . ?
B3A_3 F33A_3 1.370(3) . ?
B3A_3 F31A_3 1.404(3) . ?
B3B_3 F32B_3 1.365(14) . ?
B3B_3 F34B_3 1.371(14) . ?
B3B_3 F33B_3 1.377(14) . ?
B3B_3 F31B_3 1.378(14) . ?
N11_3 C12_3 1.2959(17) . ?
N11_3 C20_3 1.3782(18) . ?
C12_3 N13_3 1.4154(17) . ?
C12_3 C32_3 1.4676(18) . ?
N13_3 C14_3 1.3759(17) . ?
N13_3 C22_3 1.4482(17) . ?
C14_3 N14_3 1.3101(18) . ?
C14_3 C15_3 1.4365(19) . ?
N14_3 H14A_3 0.893(17) . ?
N14_3 H14B_3 0.821(17) . ?
C15_3 C20_3 1.405(2) . ?
C15_3 C16_3 1.4085(19) . ?
C16_3 C17_3 1.374(2) . ?
C16_3 H16_3 0.9500 . ?
C17_3 C18_3 1.396(2) . ?
C17_3 H17_3 0.9500 . ?
C18_3 C19_3 1.375(2) . ?
C18_3 H18_3 0.9500 . ?
C19_3 C20_3 1.4052(19) . ?
C19_3 H19_3 0.9500 . ?
C21_3 C26_3 1.4014(19) . ?
C21_3 C22_3 1.4020(18) . ?
C21_3 C31_3 1.464(2) . ?
C22_3 C23_3 1.391(2) . ?
C23_3 C24_3 1.3850(19) . ?
C23_3 H23_3 0.9500 . ?
C24_3 C25_3 1.390(2) . ?
C24_3 H24_3 0.9500 . ?
C25_3 C26_3 1.378(2) . ?
C25_3 H25_3 0.9500 . ?
C26_3 H26_3 0.9500 . ?
C31_3 C32_3 1.4031(19) . ?
C31_3 C36_3 1.4056(19) . ?
C32_3 C33_3 1.400(2) . ?
C33_3 C34_3 1.389(2) . ?
C33_3 H33_3 0.9500 . ?
C34_3 C35_3 1.400(2) . ?
C34_3 C37_3 1.499(2) . ?
C35_3 C36_3 1.379(2) . ?
C35_3 H35_3 0.9500 . ?
C36_3 H36_3 0.9500 . ?
C37_3 H37A_3 0.9800 . ?
C37_3 H37B_3 0.9800 . ?
C37_3 H37C_3 0.9800 . ?
B4_4 F43_4 1.374(2) . ?
B4_4 F42_4 1.3804(19) . ?
B4_4 F44_4 1.3874(19) . ?
B4_4 F41_4 1.3926(17) . ?
N11_4 C12_4 1.2983(17) . ?
N11_4 C20_4 1.3799(17) . ?
C12_4 N13_4 1.4166(17) . ?
C12_4 C32_4 1.4596(18) . ?
N13_4 C14_4 1.3788(16) . ?
N13_4 C22_4 1.4493(16) . ?
C14_4 N14_4 1.3119(18) . ?
C14_4 C15_4 1.4388(18) . ?
N14_4 H14A_4 0.862(17) . ?
N14_4 H14B_4 0.843(17) . ?
C15_4 C20_4 1.4021(19) . ?
C15_4 C16_4 1.4102(18) . ?
C16_4 C17_4 1.376(2) . ?
C16_4 H16_4 0.9500 . ?
C17_4 C18_4 1.397(2) . ?
C17_4 H17_4 0.9500 . ?
C18_4 C19_4 1.375(2) . ?
C18_4 H18_4 0.9500 . ?
C19_4 C20_4 1.4014(19) . ?
C19_4 H19_4 0.9500 . ?
C21_4 C22_4 1.4009(18) . ?
C21_4 C26_4 1.4027(19) . ?
C21_4 C31_4 1.4661(19) . ?
C22_4 C23_4 1.3935(19) . ?
C23_4 C24_4 1.3895(19) . ?
C23_4 H23_4 0.9500 . ?
C24_4 C25_4 1.388(2) . ?
C24_4 H24_4 0.9500 . ?
C25_4 C26_4 1.378(2) . ?
C25_4 H25_4 0.9500 . ?
C26_4 H26_4 0.9500 . ?
C31_4 C32_4 1.4014(19) . ?
C31_4 C36_4 1.4042(18) . ?
C32_4 C33_4 1.4046(19) . ?
C33_4 C34_4 1.3841(19) . ?
C33_4 H33_4 0.9500 . ?
C34_4 C35_4 1.403(2) . ?
C34_4 C37_4 1.501(2) . ?
C35_4 C36_4 1.375(2) . ?
C35_4 H35_4 0.9500 . ?
C36_4 H36_4 0.9500 . ?
C37_4 H37A_4 0.9800 . ?
C37_4 H37B_4 0.9800 . ?
C37_4 H37C_4 0.9800 . ?

loop_
 _geom_angle_atom_site_label_1
 _geom_angle_atom_site_label_2
 _geom_angle_atom_site_label_3
 _geom_angle
 _geom_angle_site_symmetry_1
 _geom_angle_site_symmetry_3
 _geom_angle_publ_flag
F14_1 B1_1 F12_1 108.65(14) . . ?
F14_1 B1_1 F13_1 109.63(14) . . ?
F12_1 B1_1 F13_1 109.96(14) . . ?
F14_1 B1_1 F11_1 110.34(13) . . ?
F12_1 B1_1 F11_1 109.52(13) . . ?
F13_1 B1_1 F11_1 108.74(13) . . ?
C12_1 N11_1 C20_1 118.81(12) . . ?
N11_1 C12_1 N13_1 123.15(12) . . ?
N11_1 C12_1 C32_1 118.97(12) . . ?
N13_1 C12_1 C32_1 117.58(11) . . ?
C14_1 N13_1 C12_1 118.14(11) . . ?
C14_1 N13_1 C22_1 122.51(11) . . ?
C12_1 N13_1 C22_1 119.35(10) . . ?
N14_1 C14_1 N13_1 120.18(12) . . ?
N14_1 C14_1 C15_1 122.48(12) . . ?
N13_1 C14_1 C15_1 117.34(12) . . ?
C14_1 N14_1 H14A_1 119.6(12) . . ?
C14_1 N14_1 H14B_1 122.0(11) . . ?
H14A_1 N14_1 H14B_1 118.1(16) . . ?
C20_1 C15_1 C16_1 119.76(13) . . ?
C20_1 C15_1 C14_1 117.63(12) . . ?
C16_1 C15_1 C14_1 122.58(13) . . ?
C17_1 C16_1 C15_1 119.38(14) . . ?
C17_1 C16_1 H16_1 120.3 . . ?
C15_1 C16_1 H16_1 120.3 . . ?
C16_1 C17_1 C18_1 120.76(13) . . ?
C16_1 C17_1 H17_1 119.6 . . ?
C18_1 C17_1 H17_1 119.6 . . ?
C19_1 C18_1 C17_1 120.70(14) . . ?
C19_1 C18_1 H18_1 119.7 . . ?
C17_1 C18_1 H18_1 119.7 . . ?
C18_1 C19_1 C20_1 119.66(15) . . ?
C18_1 C19_1 H19_1 120.2 . . ?
C20_1 C19_1 H19_1 120.2 . . ?
N11_1 C20_1 C15_1 121.73(12) . . ?
N11_1 C20_1 C19_1 118.30(13) . . ?
C15_1 C20_1 C19_1 119.71(13) . . ?
C26_1 C21_1 C22_1 117.60(12) . . ?
C26_1 C21_1 C31_1 121.58(12) . . ?
C22_1 C21_1 C31_1 120.36(12) . . ?
C23_1 C22_1 C21_1 120.73(12) . . ?
C23_1 C22_1 N13_1 120.61(11) . . ?
C21_1 C22_1 N13_1 118.31(12) . . ?
C24_1 C23_1 C22_1 119.83(12) . . ?
C24_1 C23_1 H23_1 120.1 . . ?
C22_1 C23_1 H23_1 120.1 . . ?
C23_1 C24_1 C25_1 120.17(13) . . ?
C23_1 C24_1 H24_1 119.9 . . ?
C25_1 C24_1 H24_1 119.9 . . ?
C26_1 C25_1 C24_1 119.99(13) . . ?
C26_1 C25_1 H25_1 120.0 . . ?
C24_1 C25_1 H25_1 120.0 . . ?
C25_1 C26_1 C21_1 121.44(12) . . ?
C25_1 C26_1 H26_1 119.3 . . ?
C21_1 C26_1 H26_1 119.3 . . ?
C36_1 C31_1 C32_1 118.00(12) . . ?
C36_1 C31_1 C21_1 123.29(12) . . ?
C32_1 C31_1 C21_1 118.56(11) . . ?
C31_1 C32_1 C33_1 120.76(12) . . ?
C31_1 C32_1 C12_1 120.52(12) . . ?
C33_1 C32_1 C12_1 118.57(12) . . ?
C34_1 C33_1 C32_1 120.61(13) . . ?
C34_1 C33_1 H33_1 119.7 . . ?
C32_1 C33_1 H33_1 119.7 . . ?
C33_1 C34_1 C35_1 118.32(13) . . ?
C33_1 C34_1 C37_1 121.10(14) . . ?
C35_1 C34_1 C37_1 120.56(13) . . ?
C36_1 C35_1 C34_1 121.77(13) . . ?
C36_1 C35_1 H35_1 119.1 . . ?
C34_1 C35_1 H35_1 119.1 . . ?
C35_1 C36_1 C31_1 120.50(13) . . ?
C35_1 C36_1 H36_1 119.7 . . ?
C31_1 C36_1 H36_1 119.7 . . ?
F24A_2 B2A_2 F22A_2 110.49(19) . . ?
F24A_2 B2A_2 F21A_2 108.18(17) . . ?
F22A_2 B2A_2 F21A_2 109.3(2) . . ?
F24A_2 B2A_2 F23A_2 108.98(17) . . ?
F22A_2 B2A_2 F23A_2 110.60(19) . . ?
F21A_2 B2A_2 F23A_2 109.20(17) . . ?
F23B_2 B2B_2 F22B_2 110.0(13) . . ?
F23B_2 B2B_2 F24B_2 110.2(16) . . ?
F22B_2 B2B_2 F24B_2 110.0(16) . . ?
F23B_2 B2B_2 F21B_2 110.7(13) . . ?
F22B_2 B2B_2 F21B_2 104.7(12) . . ?
F24B_2 B2B_2 F21B_2 111.0(16) . . ?
C12_2 N11_2 C20_2 119.27(13) . . ?
N11_2 C12_2 N13_2 123.04(12) . . ?
N11_2 C12_2 C32_2 119.11(12) . . ?
N13_2 C12_2 C32_2 117.58(12) . . ?
C14_2 N13_2 C12_2 118.10(12) . . ?
C14_2 N13_2 C22_2 122.97(12) . . ?
C12_2 N13_2 C22_2 118.94(11) . . ?
N14_2 C14_2 N13_2 120.41(14) . . ?
N14_2 C14_2 C15_2 121.92(14) . . ?
N13_2 C14_2 C15_2 117.66(13) . . ?
C14_2 N14_2 H14A_2 121.5(13) . . ?
C14_2 N14_2 H14B_2 118.1(12) . . ?
H14A_2 N14_2 H14B_2 120.4(19) . . ?
C20_2 C15_2 C16_2 119.01(14) . . ?
C20_2 C15_2 C14_2 117.66(13) . . ?
C16_2 C15_2 C14_2 123.33(14) . . ?
C17_2 C16_2 C15_2 119.70(16) . . ?
C17_2 C16_2 H16_2 120.1 . . ?
C15_2 C16_2 H16_2 120.1 . . ?
C16_2 C17_2 C18_2 121.00(15) . . ?
C16_2 C17_2 H17_2 119.5 . . ?
C18_2 C17_2 H17_2 119.5 . . ?
C19_2 C18_2 C17_2 120.29(15) . . ?
C19_2 C18_2 H18_2 119.9 . . ?
C17_2 C18_2 H18_2 119.9 . . ?
C18_2 C19_2 C20_2 120.01(15) . . ?
C18_2 C19_2 H19_2 120.0 . . ?
C20_2 C19_2 H19_2 120.0 . . ?
N11_2 C20_2 C19_2 118.48(14) . . ?
N11_2 C20_2 C15_2 121.37(13) . . ?
C19_2 C20_2 C15_2 119.98(13) . . ?
C26_2 C21_2 C22_2 118.30(13) . . ?
C26_2 C21_2 C31_2 121.28(13) . . ?
C22_2 C21_2 C31_2 119.90(13) . . ?
C23_2 C22_2 C21_2 120.36(13) . . ?
C23_2 C22_2 N13_2 120.17(13) . . ?
C21_2 C22_2 N13_2 119.09(12) . . ?
C24_2 C23_2 C22_2 119.53(15) . . ?
C24_2 C23_2 H23_2 120.2 . . ?
C22_2 C23_2 H23_2 120.2 . . ?
C25_2 C24_2 C23_2 120.57(15) . . ?
C25_2 C24_2 H24_2 119.7 . . ?
C23_2 C24_2 H24_2 119.7 . . ?
C26_2 C25_2 C24_2 119.90(15) . . ?
C26_2 C25_2 H25_2 120.1 . . ?
C24_2 C25_2 H25_2 120.1 . . ?
C25_2 C26_2 C21_2 121.09(15) . . ?
C25_2 C26_2 H26_2 119.5 . . ?
C21_2 C26_2 H26_2 119.5 . . ?
C32_2 C31_2 C36_2 118.52(13) . . ?
C32_2 C31_2 C21_2 118.40(12) . . ?
C36_2 C31_2 C21_2 122.92(13) . . ?
C31_2 C32_2 C33_2 120.49(12) . . ?
C31_2 C32_2 C12_2 121.04(13) . . ?
C33_2 C32_2 C12_2 118.32(12) . . ?
C34_2 C33_2 C32_2 120.75(13) . . ?
C34_2 C33_2 H33_2 119.6 . . ?
C32_2 C33_2 H33_2 119.6 . . ?
C33_2 C34_2 C35_2 118.18(13) . . ?
C33_2 C34_2 C37_2 121.60(14) . . ?
C35_2 C34_2 C37_2 120.21(13) . . ?
C36_2 C35_2 C34_2 121.89(13) . . ?
C36_2 C35_2 H35_2 119.1 . . ?
C34_2 C35_2 H35_2 119.1 . . ?
C35_2 C36_2 C31_2 120.11(13) . . ?
C35_2 C36_2 H36_2 119.9 . . ?
C31_2 C36_2 H36_2 119.9 . . ?
C34_2 C37_2 H37A_2 109.5 . . ?
C34_2 C37_2 H37B_2 109.5 . . ?
H37A_2 C37_2 H37B_2 109.5 . . ?
C34_2 C37_2 H37C_2 109.5 . . ?
H37A_2 C37_2 H37C_2 109.5 . . ?
H37B_2 C37_2 H37C_2 109.5 . . ?
F32A_3 B3A_3 F34A_3 111.7(2) . . ?
F32A_3 B3A_3 F33A_3 108.5(2) . . ?
F34A_3 B3A_3 F33A_3 109.4(2) . . ?
F32A_3 B3A_3 F31A_3 111.0(2) . . ?
F34A_3 B3A_3 F31A_3 109.2(3) . . ?
F33A_3 B3A_3 F31A_3 106.8(2) . . ?
F32B_3 B3B_3 F34B_3 113.8(16) . . ?
F32B_3 B3B_3 F33B_3 107.4(13) . . ?
F34B_3 B3B_3 F33B_3 109.7(16) . . ?
F32B_3 B3B_3 F31B_3 107.5(15) . . ?
F34B_3 B3B_3 F31B_3 109.2(17) . . ?
F33B_3 B3B_3 F31B_3 109.1(16) . . ?
C12_3 N11_3 C20_3 118.83(12) . . ?
N11_3 C12_3 N13_3 123.00(12) . . ?
N11_3 C12_3 C32_3 119.52(13) . . ?
N13_3 C12_3 C32_3 117.16(12) . . ?
C14_3 N13_3 C12_3 118.33(11) . . ?
C14_3 N13_3 C22_3 122.31(11) . . ?
C12_3 N13_3 C22_3 119.36(11) . . ?
N14_3 C14_3 N13_3 120.11(12) . . ?
N14_3 C14_3 C15_3 122.39(13) . . ?
N13_3 C14_3 C15_3 117.50(12) . . ?
C14_3 N14_3 H14A_3 119.4(11) . . ?
C14_3 N14_3 H14B_3 118.1(12) . . ?
H14A_3 N14_3 H14B_3 121.6(17) . . ?
C20_3 C15_3 C16_3 119.53(13) . . ?
C20_3 C15_3 C14_3 117.79(12) . . ?
C16_3 C15_3 C14_3 122.68(13) . . ?
C17_3 C16_3 C15_3 119.56(15) . . ?
C17_3 C16_3 H16_3 120.2 . . ?
C15_3 C16_3 H16_3 120.2 . . ?
C16_3 C17_3 C18_3 121.00(14) . . ?
C16_3 C17_3 H17_3 119.5 . . ?
C18_3 C17_3 H17_3 119.5 . . ?
C19_3 C18_3 C17_3 120.25(14) . . ?
C19_3 C18_3 H18_3 119.9 . . ?
C17_3 C18_3 H18_3 119.9 . . ?
C18_3 C19_3 C20_3 119.93(14) . . ?
C18_3 C19_3 H19_3 120.0 . . ?
C20_3 C19_3 H19_3 120.0 . . ?
N11_3 C20_3 C15_3 121.46(12) . . ?
N11_3 C20_3 C19_3 118.60(13) . . ?
C15_3 C20_3 C19_3 119.72(13) . . ?
C26_3 C21_3 C22_3 117.57(13) . . ?
C26_3 C21_3 C31_3 122.13(12) . . ?
C22_3 C21_3 C31_3 119.83(12) . . ?
C23_3 C22_3 C21_3 120.95(12) . . ?
C23_3 C22_3 N13_3 120.06(12) . . ?
C21_3 C22_3 N13_3 118.73(12) . . ?
C24_3 C23_3 C22_3 119.67(13) . . ?
C24_3 C23_3 H23_3 120.2 . . ?
C22_3 C23_3 H23_3 120.2 . . ?
C23_3 C24_3 C25_3 120.15(14) . . ?
C23_3 C24_3 H24_3 119.9 . . ?
C25_3 C24_3 H24_3 119.9 . . ?
C26_3 C25_3 C24_3 119.76(13) . . ?
C26_3 C25_3 H25_3 120.1 . . ?
C24_3 C25_3 H25_3 120.1 . . ?
C25_3 C26_3 C21_3 121.49(13) . . ?
C25_3 C26_3 H26_3 119.3 . . ?
C21_3 C26_3 H26_3 119.3 . . ?
C32_3 C31_3 C36_3 117.81(13) . . ?
C32_3 C31_3 C21_3 118.73(12) . . ?
C36_3 C31_3 C21_3 123.29(13) . . ?
C33_3 C32_3 C31_3 121.04(12) . . ?
C33_3 C32_3 C12_3 117.99(12) . . ?
C31_3 C32_3 C12_3 120.77(13) . . ?
C34_3 C33_3 C32_3 120.72(13) . . ?
C34_3 C33_3 H33_3 119.6 . . ?
C32_3 C33_3 H33_3 119.6 . . ?
C33_3 C34_3 C35_3 117.97(14) . . ?
C33_3 C34_3 C37_3 121.05(14) . . ?
C35_3 C34_3 C37_3 120.97(13) . . ?
C36_3 C35_3 C34_3 121.94(13) . . ?
C36_3 C35_3 H35_3 119.0 . . ?
C34_3 C35_3 H35_3 119.0 . . ?
C35_3 C36_3 C31_3 120.50(14) . . ?
C35_3 C36_3 H36_3 119.8 . . ?
C31_3 C36_3 H36_3 119.8 . . ?
C34_3 C37_3 H37A_3 109.5 . . ?
C34_3 C37_3 H37B_3 109.5 . . ?
H37A_3 C37_3 H37B_3 109.5 . . ?
C34_3 C37_3 H37C_3 109.5 . . ?
H37A_3 C37_3 H37C_3 109.5 . . ?
H37B_3 C37_3 H37C_3 109.5 . . ?
F43_4 B4_4 F42_4 110.28(14) . . ?
F43_4 B4_4 F44_4 108.46(13) . . ?
F42_4 B4_4 F44_4 110.28(13) . . ?
F43_4 B4_4 F41_4 109.63(13) . . ?
F42_4 B4_4 F41_4 109.30(12) . . ?
F44_4 B4_4 F41_4 108.87(12) . . ?
C12_4 N11_4 C20_4 118.85(12) . . ?
N11_4 C12_4 N13_4 122.97(12) . . ?
N11_4 C12_4 C32_4 118.77(12) . . ?
N13_4 C12_4 C32_4 118.05(12) . . ?
C14_4 N13_4 C12_4 118.42(11) . . ?
C14_4 N13_4 C22_4 122.78(11) . . ?
C12_4 N13_4 C22_4 118.78(10) . . ?
N14_4 C14_4 N13_4 120.77(12) . . ?
N14_4 C14_4 C15_4 121.74(12) . . ?
N13_4 C14_4 C15_4 117.49(12) . . ?
C14_4 N14_4 H14A_4 119.7(11) . . ?
C14_4 N14_4 H14B_4 122.0(11) . . ?
H14A_4 N14_4 H14B_4 118.2(16) . . ?
C20_4 C15_4 C16_4 119.44(12) . . ?
C20_4 C15_4 C14_4 117.97(11) . . ?
C16_4 C15_4 C14_4 122.59(13) . . ?
C17_4 C16_4 C15_4 119.32(14) . . ?
C17_4 C16_4 H16_4 120.3 . . ?
C15_4 C16_4 H16_4 120.3 . . ?
C16_4 C17_4 C18_4 121.23(13) . . ?
C16_4 C17_4 H17_4 119.4 . . ?
C18_4 C17_4 H17_4 119.4 . . ?
C19_4 C18_4 C17_4 119.98(13) . . ?
C19_4 C18_4 H18_4 120.0 . . ?
C17_4 C18_4 H18_4 120.0 . . ?
C18_4 C19_4 C20_4 120.00(14) . . ?
C18_4 C19_4 H19_4 120.0 . . ?
C20_4 C19_4 H19_4 120.0 . . ?
N11_4 C20_4 C19_4 118.24(13) . . ?
N11_4 C20_4 C15_4 121.55(12) . . ?
C19_4 C20_4 C15_4 120.03(12) . . ?
C22_4 C21_4 C26_4 117.75(13) . . ?
C22_4 C21_4 C31_4 120.09(12) . . ?
C26_4 C21_4 C31_4 121.51(12) . . ?
C23_4 C22_4 C21_4 120.76(12) . . ?
C23_4 C22_4 N13_4 119.97(12) . . ?
C21_4 C22_4 N13_4 118.93(12) . . ?
C24_4 C23_4 C22_4 119.66(13) . . ?
C24_4 C23_4 H23_4 120.2 . . ?
C22_4 C23_4 H23_4 120.2 . . ?
C25_4 C24_4 C23_4 120.17(14) . . ?
C25_4 C24_4 H24_4 119.9 . . ?
C23_4 C24_4 H24_4 119.9 . . ?
C26_4 C25_4 C24_4 119.75(13) . . ?
C26_4 C25_4 H25_4 120.1 . . ?
C24_4 C25_4 H25_4 120.1 . . ?
C25_4 C26_4 C21_4 121.54(13) . . ?
C25_4 C26_4 H26_4 119.2 . . ?
C21_4 C26_4 H26_4 119.2 . . ?
C32_4 C31_4 C36_4 118.16(13) . . ?
C32_4 C31_4 C21_4 118.46(12) . . ?
C36_4 C31_4 C21_4 123.12(13) . . ?
C31_4 C32_4 C33_4 120.61(12) . . ?
C31_4 C32_4 C12_4 120.77(12) . . ?
C33_4 C32_4 C12_4 118.54(12) . . ?
C34_4 C33_4 C32_4 120.97(13) . . ?
C34_4 C33_4 H33_4 119.5 . . ?
C32_4 C33_4 H33_4 119.5 . . ?
C33_4 C34_4 C35_4 117.76(13) . . ?
C33_4 C34_4 C37_4 121.35(14) . . ?
C35_4 C34_4 C37_4 120.88(12) . . ?
C36_4 C35_4 C34_4 122.11(13) . . ?
C36_4 C35_4 H35_4 118.9 . . ?
C34_4 C35_4 H35_4 118.9 . . ?
C35_4 C36_4 C31_4 120.35(13) . . ?
C35_4 C36_4 H36_4 119.8 . . ?
C31_4 C36_4 H36_4 119.8 . . ?
C34_4 C37_4 H37A_4 109.5 . . ?
C34_4 C37_4 H37B_4 109.5 . . ?
H37A_4 C37_4 H37B_4 109.5 . . ?
C34_4 C37_4 H37C_4 109.5 . . ?
H37A_4 C37_4 H37C_4 109.5 . . ?
H37B_4 C37_4 H37C_4 109.5 . . ?

loop_
 _geom_torsion_atom_site_label_1
 _geom_torsion_atom_site_label_2
 _geom_torsion_atom_site_label_3
 _geom_torsion_atom_site_label_4
 _geom_torsion
 _geom_torsion_site_symmetry_1
 _geom_torsion_site_symmetry_2
 _geom_torsion_site_symmetry_3
 _geom_torsion_site_symmetry_4
 _geom_torsion_publ_flag
C20_1 N11_1 C12_1 N13_1 3.45(19) . . . . ?
C20_1 N11_1 C12_1 C32_1 -170.22(11) . . . . ?
N11_1 C12_1 N13_1 C14_1 -18.04(19) . . . . ?
C32_1 C12_1 N13_1 C14_1 155.71(12) . . . . ?
N11_1 C12_1 N13_1 C22_1 162.16(12) . . . . ?
C32_1 C12_1 N13_1 C22_1 -24.09(17) . . . . ?
C12_1 N13_1 C14_1 N14_1 -160.71(12) . . . . ?
C22_1 N13_1 C14_1 N14_1 19.08(19) . . . . ?
C12_1 N13_1 C14_1 C15_1 19.34(17) . . . . ?
C22_1 N13_1 C14_1 C15_1 -160.87(12) . . . . ?
N14_1 C14_1 C15_1 C20_1 172.21(13) . . . . ?
N13_1 C14_1 C15_1 C20_1 -7.84(18) . . . . ?
N14_1 C14_1 C15_1 C16_1 -6.1(2) . . . . ?
N13_1 C14_1 C15_1 C16_1 173.80(12) . . . . ?
C20_1 C15_1 C16_1 C17_1 1.5(2) . . . . ?
C14_1 C15_1 C16_1 C17_1 179.87(13) . . . . ?
C15_1 C16_1 C17_1 C18_1 -0.1(2) . . . . ?
C16_1 C17_1 C18_1 C19_1 -0.6(2) . . . . ?
C17_1 C18_1 C19_1 C20_1 -0.1(2) . . . . ?
C12_1 N11_1 C20_1 C15_1 9.00(19) . . . . ?
C12_1 N11_1 C20_1 C19_1 -176.87(12) . . . . ?
C16_1 C15_1 C20_1 N11_1 171.81(12) . . . . ?
C14_1 C15_1 C20_1 N11_1 -6.60(19) . . . . ?
C16_1 C15_1 C20_1 C19_1 -2.2(2) . . . . ?
C14_1 C15_1 C20_1 C19_1 179.35(12) . . . . ?
C18_1 C19_1 C20_1 N11_1 -172.71(13) . . . . ?
C18_1 C19_1 C20_1 C15_1 1.5(2) . . . . ?
C26_1 C21_1 C22_1 C23_1 -5.44(19) . . . . ?
C31_1 C21_1 C22_1 C23_1 166.95(13) . . . . ?
C26_1 C21_1 C22_1 N13_1 -178.59(11) . . . . ?
C31_1 C21_1 C22_1 N13_1 -6.20(18) . . . . ?
C14_1 N13_1 C22_1 C23_1 31.07(18) . . . . ?
C12_1 N13_1 C22_1 C23_1 -149.14(13) . . . . ?
C14_1 N13_1 C22_1 C21_1 -155.77(12) . . . . ?
C12_1 N13_1 C22_1 C21_1 24.02(17) . . . . ?
C21_1 C22_1 C23_1 C24_1 4.3(2) . . . . ?
N13_1 C22_1 C23_1 C24_1 177.25(12) . . . . ?
C22_1 C23_1 C24_1 C25_1 0.0(2) . . . . ?
C23_1 C24_1 C25_1 C26_1 -3.0(2) . . . . ?
C24_1 C25_1 C26_1 C21_1 1.7(2) . . . . ?
C22_1 C21_1 C26_1 C25_1 2.5(2) . . . . ?
C31_1 C21_1 C26_1 C25_1 -169.81(13) . . . . ?
C26_1 C21_1 C31_1 C36_1 -14.1(2) . . . . ?
C22_1 C21_1 C31_1 C36_1 173.78(12) . . . . ?
C26_1 C21_1 C31_1 C32_1 161.30(12) . . . . ?
C22_1 C21_1 C31_1 C32_1 -10.79(18) . . . . ?
C36_1 C31_1 C32_1 C33_1 1.80(19) . . . . ?
C21_1 C31_1 C32_1 C33_1 -173.88(12) . . . . ?
C36_1 C31_1 C32_1 C12_1 -173.77(12) . . . . ?
C21_1 C31_1 C32_1 C12_1 10.55(18) . . . . ?
N11_1 C12_1 C32_1 C31_1 -179.29(12) . . . . ?
N13_1 C12_1 C32_1 C31_1 6.70(18) . . . . ?
N11_1 C12_1 C32_1 C33_1 5.05(18) . . . . ?
N13_1 C12_1 C32_1 C33_1 -168.97(12) . . . . ?
C31_1 C32_1 C33_1 C34_1 -1.7(2) . . . . ?
C12_1 C32_1 C33_1 C34_1 173.96(12) . . . . ?
C32_1 C33_1 C34_1 C35_1 0.3(2) . . . . ?
C32_1 C33_1 C34_1 C37_1 -178.34(13) . . . . ?
C33_1 C34_1 C35_1 C36_1 1.0(2) . . . . ?
C37_1 C34_1 C35_1 C36_1 179.65(14) . . . . ?
C34_1 C35_1 C36_1 C31_1 -0.9(2) . . . . ?
C32_1 C31_1 C36_1 C35_1 -0.5(2) . . . . ?
C21_1 C31_1 C36_1 C35_1 174.94(13) . . . . ?
C20_2 N11_2 C12_2 N13_2 2.8(2) . . . . ?
C20_2 N11_2 C12_2 C32_2 -171.15(12) . . . . ?
N11_2 C12_2 N13_2 C14_2 -16.8(2) . . . . ?
C32_2 C12_2 N13_2 C14_2 157.25(12) . . . . ?
N11_2 C12_2 N13_2 C22_2 163.29(13) . . . . ?
C32_2 C12_2 N13_2 C22_2 -22.70(17) . . . . ?
C12_2 N13_2 C14_2 N14_2 -160.49(13) . . . . ?
C22_2 N13_2 C14_2 N14_2 19.5(2) . . . . ?
C12_2 N13_2 C14_2 C15_2 18.96(18) . . . . ?
C22_2 N13_2 C14_2 C15_2 -161.09(12) . . . . ?
N14_2 C14_2 C15_2 C20_2 170.68(14) . . . . ?
N13_2 C14_2 C15_2 C20_2 -8.77(19) . . . . ?
N14_2 C14_2 C15_2 C16_2 -9.1(2) . . . . ?
N13_2 C14_2 C15_2 C16_2 171.48(13) . . . . ?
C20_2 C15_2 C16_2 C17_2 1.1(2) . . . . ?
C14_2 C15_2 C16_2 C17_2 -179.11(14) . . . . ?
C15_2 C16_2 C17_2 C18_2 -1.3(2) . . . . ?
C16_2 C17_2 C18_2 C19_2 0.7(2) . . . . ?
C17_2 C18_2 C19_2 C20_2 0.1(2) . . . . ?
C12_2 N11_2 C20_2 C19_2 -176.61(13) . . . . ?
C12_2 N11_2 C20_2 C15_2 8.2(2) . . . . ?
C18_2 C19_2 C20_2 N11_2 -175.47(13) . . . . ?
C18_2 C19_2 C20_2 C15_2 -0.2(2) . . . . ?
C16_2 C15_2 C20_2 N11_2 174.72(13) . . . . ?
C14_2 C15_2 C20_2 N11_2 -5.0(2) . . . . ?
C16_2 C15_2 C20_2 C19_2 -0.4(2) . . . . ?
C14_2 C15_2 C20_2 C19_2 179.84(13) . . . . ?
C26_2 C21_2 C22_2 C23_2 -5.7(2) . . . . ?
C31_2 C21_2 C22_2 C23_2 166.15(13) . . . . ?
C26_2 C21_2 C22_2 N13_2 -178.72(12) . . . . ?
C31_2 C21_2 C22_2 N13_2 -6.83(19) . . . . ?
C14_2 N13_2 C22_2 C23_2 30.8(2) . . . . ?
C12_2 N13_2 C22_2 C23_2 -149.28(13) . . . . ?
C14_2 N13_2 C22_2 C21_2 -156.23(13) . . . . ?
C12_2 N13_2 C22_2 C21_2 23.72(18) . . . . ?
C21_2 C22_2 C23_2 C24_2 4.9(2) . . . . ?
N13_2 C22_2 C23_2 C24_2 177.83(13) . . . . ?
C22_2 C23_2 C24_2 C25_2 -0.9(2) . . . . ?
C23_2 C24_2 C25_2 C26_2 -2.3(2) . . . . ?
C24_2 C25_2 C26_2 C21_2 1.4(2) . . . . ?
C22_2 C21_2 C26_2 C25_2 2.6(2) . . . . ?
C31_2 C21_2 C26_2 C25_2 -169.17(14) . . . . ?
C26_2 C21_2 C31_2 C32_2 161.23(13) . . . . ?
C22_2 C21_2 C31_2 C32_2 -10.42(19) . . . . ?
C26_2 C21_2 C31_2 C36_2 -14.1(2) . . . . ?
C22_2 C21_2 C31_2 C36_2 174.28(13) . . . . ?
C36_2 C31_2 C32_2 C33_2 2.1(2) . . . . ?
C21_2 C31_2 C32_2 C33_2 -173.37(12) . . . . ?
C36_2 C31_2 C32_2 C12_2 -173.26(12) . . . . ?
C21_2 C31_2 C32_2 C12_2 11.22(19) . . . . ?
N11_2 C12_2 C32_2 C31_2 179.49(13) . . . . ?
N13_2 C12_2 C32_2 C31_2 5.24(19) . . . . ?
N11_2 C12_2 C32_2 C33_2 3.98(19) . . . . ?
N13_2 C12_2 C32_2 C33_2 -170.27(12) . . . . ?
C31_2 C32_2 C33_2 C34_2 -2.3(2) . . . . ?
C12_2 C32_2 C33_2 C34_2 173.27(13) . . . . ?
C32_2 C33_2 C34_2 C35_2 0.5(2) . . . . ?
C32_2 C33_2 C34_2 C37_2 -178.23(14) . . . . ?
C33_2 C34_2 C35_2 C36_2 1.4(2) . . . . ?
C37_2 C34_2 C35_2 C36_2 -179.86(14) . . . . ?
C34_2 C35_2 C36_2 C31_2 -1.5(2) . . . . ?
C32_2 C31_2 C36_2 C35_2 -0.3(2) . . . . ?
C21_2 C31_2 C36_2 C35_2 175.01(13) . . . . ?
C20_3 N11_3 C12_3 N13_3 -3.3(2) . . . . ?
C20_3 N11_3 C12_3 C32_3 170.02(11) . . . . ?
N11_3 C12_3 N13_3 C14_3 17.71(19) . . . . ?
C32_3 C12_3 N13_3 C14_3 -155.76(12) . . . . ?
N11_3 C12_3 N13_3 C22_3 -163.41(13) . . . . ?
C32_3 C12_3 N13_3 C22_3 23.12(17) . . . . ?
C12_3 N13_3 C14_3 N14_3 160.06(13) . . . . ?
C22_3 N13_3 C14_3 N14_3 -18.79(19) . . . . ?
C12_3 N13_3 C14_3 C15_3 -19.11(18) . . . . ?
C22_3 N13_3 C14_3 C15_3 162.05(12) . . . . ?
N14_3 C14_3 C15_3 C20_3 -171.32(13) . . . . ?
N13_3 C14_3 C15_3 C20_3 7.82(18) . . . . ?
N14_3 C14_3 C15_3 C16_3 8.4(2) . . . . ?
N13_3 C14_3 C15_3 C16_3 -172.51(12) . . . . ?
C20_3 C15_3 C16_3 C17_3 -1.3(2) . . . . ?
C14_3 C15_3 C16_3 C17_3 179.02(13) . . . . ?
C15_3 C16_3 C17_3 C18_3 0.6(2) . . . . ?
C16_3 C17_3 C18_3 C19_3 0.3(2) . . . . ?
C17_3 C18_3 C19_3 C20_3 -0.4(2) . . . . ?
C12_3 N11_3 C20_3 C15_3 -8.81(19) . . . . ?
C12_3 N11_3 C20_3 C19_3 176.65(13) . . . . ?
C16_3 C15_3 C20_3 N11_3 -173.29(12) . . . . ?
C14_3 C15_3 C20_3 N11_3 6.40(19) . . . . ?
C16_3 C15_3 C20_3 C19_3 1.2(2) . . . . ?
C14_3 C15_3 C20_3 C19_3 -179.11(13) . . . . ?
C18_3 C19_3 C20_3 N11_3 174.30(13) . . . . ?
C18_3 C19_3 C20_3 C15_3 -0.3(2) . . . . ?
C26_3 C21_3 C22_3 C23_3 7.4(2) . . . . ?
C31_3 C21_3 C22_3 C23_3 -164.89(13) . . . . ?
C26_3 C21_3 C22_3 N13_3 -178.53(12) . . . . ?
C31_3 C21_3 C22_3 N13_3 9.22(19) . . . . ?
C14_3 N13_3 C22_3 C23_3 -32.76(19) . . . . ?
C12_3 N13_3 C22_3 C23_3 148.41(13) . . . . ?
C14_3 N13_3 C22_3 C21_3 153.08(13) . . . . ?
C12_3 N13_3 C22_3 C21_3 -25.75(18) . . . . ?
C21_3 C22_3 C23_3 C24_3 -5.8(2) . . . . ?
N13_3 C22_3 C23_3 C24_3 -179.80(13) . . . . ?
C22_3 C23_3 C24_3 C25_3 0.2(2) . . . . ?
C23_3 C24_3 C25_3 C26_3 3.6(2) . . . . ?
C24_3 C25_3 C26_3 C21_3 -1.8(2) . . . . ?
C22_3 C21_3 C26_3 C25_3 -3.6(2) . . . . ?
C31_3 C21_3 C26_3 C25_3 168.50(14) . . . . ?
C26_3 C21_3 C31_3 C32_3 -162.91(13) . . . . ?
C22_3 C21_3 C31_3 C32_3 8.99(19) . . . . ?
C26_3 C21_3 C31_3 C36_3 12.2(2) . . . . ?
C22_3 C21_3 C31_3 C36_3 -175.90(13) . . . . ?
C36_3 C31_3 C32_3 C33_3 -1.5(2) . . . . ?
C21_3 C31_3 C32_3 C33_3 173.90(12) . . . . ?
C36_3 C31_3 C32_3 C12_3 173.27(12) . . . . ?
C21_3 C31_3 C32_3 C12_3 -11.35(19) . . . . ?
N11_3 C12_3 C32_3 C33_3 -3.38(19) . . . . ?
N13_3 C12_3 C32_3 C33_3 170.32(12) . . . . ?
N11_3 C12_3 C32_3 C31_3 -178.29(13) . . . . ?
N13_3 C12_3 C32_3 C31_3 -4.59(19) . . . . ?
C31_3 C32_3 C33_3 C34_3 2.2(2) . . . . ?
C12_3 C32_3 C33_3 C34_3 -172.66(13) . . . . ?
C32_3 C33_3 C34_3 C35_3 -1.3(2) . . . . ?
C32_3 C33_3 C34_3 C37_3 177.38(13) . . . . ?
C33_3 C34_3 C35_3 C36_3 -0.3(2) . . . . ?
C37_3 C34_3 C35_3 C36_3 -179.00(14) . . . . ?
C34_3 C35_3 C36_3 C31_3 1.0(2) . . . . ?
C32_3 C31_3 C36_3 C35_3 -0.1(2) . . . . ?
C21_3 C31_3 C36_3 C35_3 -175.28(13) . . . . ?
C20_4 N11_4 C12_4 N13_4 -4.48(19) . . . . ?
C20_4 N11_4 C12_4 C32_4 170.09(11) . . . . ?
N11_4 C12_4 N13_4 C14_4 17.52(19) . . . . ?
C32_4 C12_4 N13_4 C14_4 -157.10(12) . . . . ?
N11_4 C12_4 N13_4 C22_4 -163.65(12) . . . . ?
C32_4 C12_4 N13_4 C22_4 21.74(17) . . . . ?
C12_4 N13_4 C14_4 N14_4 162.18(13) . . . . ?
C22_4 N13_4 C14_4 N14_4 -16.60(19) . . . . ?
C12_4 N13_4 C14_4 C15_4 -17.69(17) . . . . ?
C22_4 N13_4 C14_4 C15_4 163.52(12) . . . . ?
N14_4 C14_4 C15_4 C20_4 -173.33(13) . . . . ?
N13_4 C14_4 C15_4 C20_4 6.55(18) . . . . ?
N14_4 C14_4 C15_4 C16_4 6.5(2) . . . . ?
N13_4 C14_4 C15_4 C16_4 -173.58(12) . . . . ?
C20_4 C15_4 C16_4 C17_4 -0.9(2) . . . . ?
C14_4 C15_4 C16_4 C17_4 179.26(13) . . . . ?
C15_4 C16_4 C17_4 C18_4 0.0(2) . . . . ?
C16_4 C17_4 C18_4 C19_4 0.2(2) . . . . ?
C17_4 C18_4 C19_4 C20_4 0.4(2) . . . . ?
C12_4 N11_4 C20_4 C19_4 177.32(13) . . . . ?
C12_4 N11_4 C20_4 C15_4 -7.51(19) . . . . ?
C18_4 C19_4 C20_4 N11_4 173.92(12) . . . . ?
C18_4 C19_4 C20_4 C15_4 -1.3(2) . . . . ?
C16_4 C15_4 C20_4 N11_4 -173.54(12) . . . . ?
C14_4 C15_4 C20_4 N11_4 6.33(19) . . . . ?
C16_4 C15_4 C20_4 C19_4 1.5(2) . . . . ?
C14_4 C15_4 C20_4 C19_4 -178.58(13) . . . . ?
C26_4 C21_4 C22_4 C23_4 6.8(2) . . . . ?
C31_4 C21_4 C22_4 C23_4 -164.13(13) . . . . ?
C26_4 C21_4 C22_4 N13_4 -179.89(12) . . . . ?
C31_4 C21_4 C22_4 N13_4 9.16(18) . . . . ?
C14_4 N13_4 C22_4 C23_4 -32.37(19) . . . . ?
C12_4 N13_4 C22_4 C23_4 148.85(13) . . . . ?
C14_4 N13_4 C22_4 C21_4 154.29(12) . . . . ?
C12_4 N13_4 C22_4 C21_4 -24.50(17) . . . . ?
C21_4 C22_4 C23_4 C24_4 -6.1(2) . . . . ?
N13_4 C22_4 C23_4 C24_4 -179.31(12) . . . . ?
C22_4 C23_4 C24_4 C25_4 1.1(2) . . . . ?
C23_4 C24_4 C25_4 C26_4 3.0(2) . . . . ?
C24_4 C25_4 C26_4 C21_4 -2.1(2) . . . . ?
C22_4 C21_4 C26_4 C25_4 -2.7(2) . . . . ?
C31_4 C21_4 C26_4 C25_4 168.09(13) . . . . ?
C22_4 C21_4 C31_4 C32_4 8.40(19) . . . . ?
C26_4 C21_4 C31_4 C32_4 -162.20(13) . . . . ?
C22_4 C21_4 C31_4 C36_4 -177.65(13) . . . . ?
C26_4 C21_4 C31_4 C36_4 11.7(2) . . . . ?
C36_4 C31_4 C32_4 C33_4 -2.1(2) . . . . ?
C21_4 C31_4 C32_4 C33_4 172.19(12) . . . . ?
C36_4 C31_4 C32_4 C12_4 174.72(12) . . . . ?
C21_4 C31_4 C32_4 C12_4 -11.03(19) . . . . ?
N11_4 C12_4 C32_4 C31_4 -178.85(12) . . . . ?
N13_4 C12_4 C32_4 C31_4 -4.01(19) . . . . ?
N11_4 C12_4 C32_4 C33_4 -2.00(19) . . . . ?
N13_4 C12_4 C32_4 C33_4 172.84(12) . . . . ?
C31_4 C32_4 C33_4 C34_4 1.7(2) . . . . ?
C12_4 C32_4 C33_4 C34_4 -175.11(12) . . . . ?
C32_4 C33_4 C34_4 C35_4 -0.2(2) . . . . ?
C32_4 C33_4 C34_4 C37_4 179.26(13) . . . . ?
C33_4 C34_4 C35_4 C36_4 -1.1(2) . . . . ?
C37_4 C34_4 C35_4 C36_4 179.50(13) . . . . ?
C34_4 C35_4 C36_4 C31_4 0.7(2) . . . . ?
C32_4 C31_4 C36_4 C35_4 0.8(2) . . . . ?
C21_4 C31_4 C36_4 C35_4 -173.11(13) . . . . ?

loop_
 _geom_hbond_atom_site_label_D
 _geom_hbond_atom_site_label_H
 _geom_hbond_atom_site_label_A
 _geom_hbond_distance_DH
 _geom_hbond_distance_HA
 _geom_hbond_distance_DA
 _geom_hbond_angle_DHA
 _geom_hbond_site_symmetry_A
N14_1 H14A_1 F11_1  0.855(17) 2.099(17) 2.9066(15) 157.5(16) .
N14_2 H14A_2 F21A_2  0.826(19) 2.132(19) 2.956(2) 174.4(18) .
N14_2 H14A_2 F21B_2  0.826(19) 2.22(2) 2.918(10) 143.0(17) .
N14_3 H14A_3 F31A_3  0.893(17) 2.047(18) 2.917(3) 164.3(15) .
N14_3 H14A_3 F31B_3  0.893(17) 1.99(3) 2.84(2) 157.9(17) .
N14_4 H14A_4 F41_4  0.862(17) 2.029(17) 2.8640(15) 162.8(16) .
N14_1 H14B_1 F23A_2  0.898(17) 2.006(18) 2.8668(18) 160.2(15) 2_666
N14_1 H14B_1 F23B_2  0.898(17) 1.99(2) 2.790(12) 147.6(15) 2_666
N14_2 H14B_2 F13_1  0.865(19) 2.03(2) 2.8223(18) 151.4(18) 2_666
N14_3 H14B_3 F34A_3  0.821(17) 2.185(18) 2.975(4) 161.5(17) 2_767
N14_3 H14B_3 F34B_3  0.821(17) 2.15(3) 2.91(3) 153.5(18) 2_767
N14_4 H14B_4 F44_4  0.843(17) 2.087(18) 2.8646(16) 153.2(15) 2_657

_diffrn_measured_fraction_theta_max    0.987
_diffrn_reflns_theta_full              31.71
_diffrn_measured_fraction_theta_full   0.987
_refine_diff_density_max    0.541
_refine_diff_density_min   -0.399
_refine_diff_density_rms    0.073
